# Supplementary material
Source: PubMed Central journal article supplement (PMC2704389)

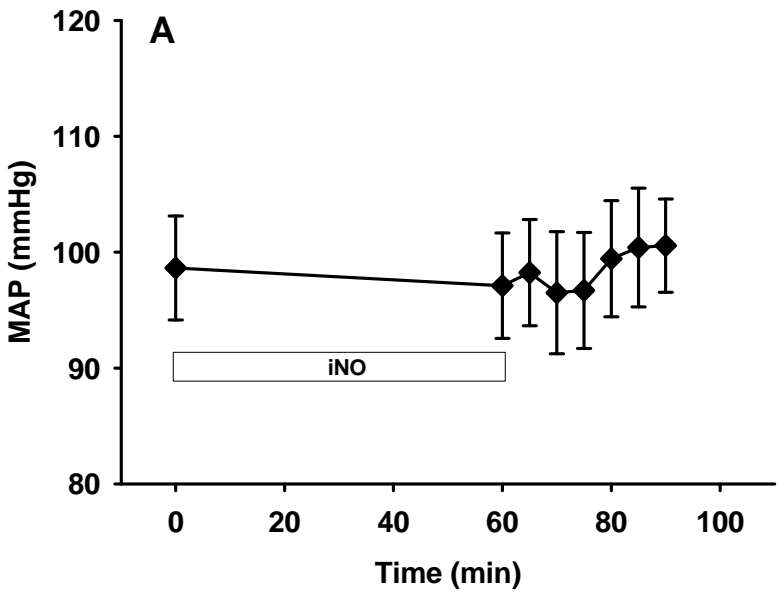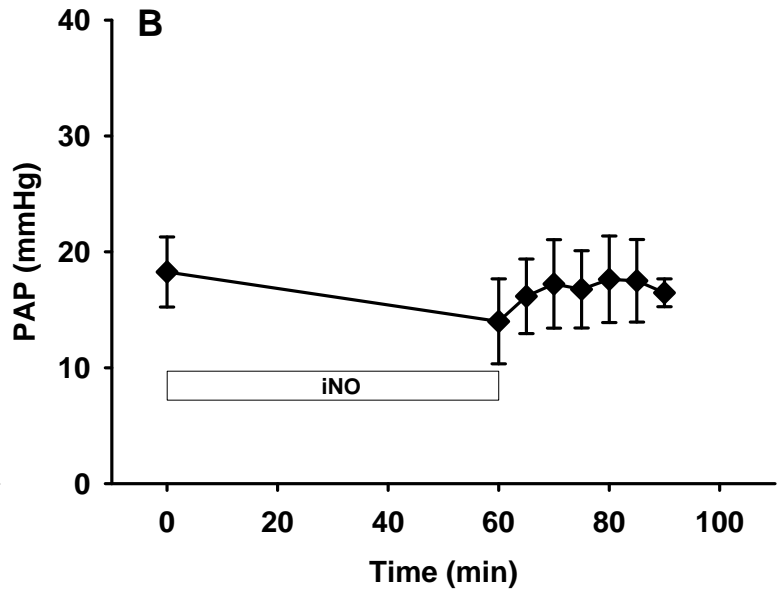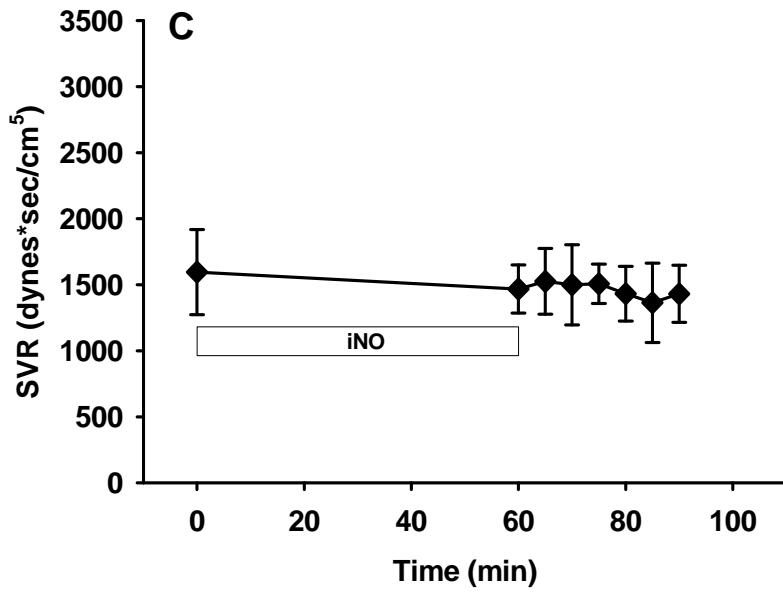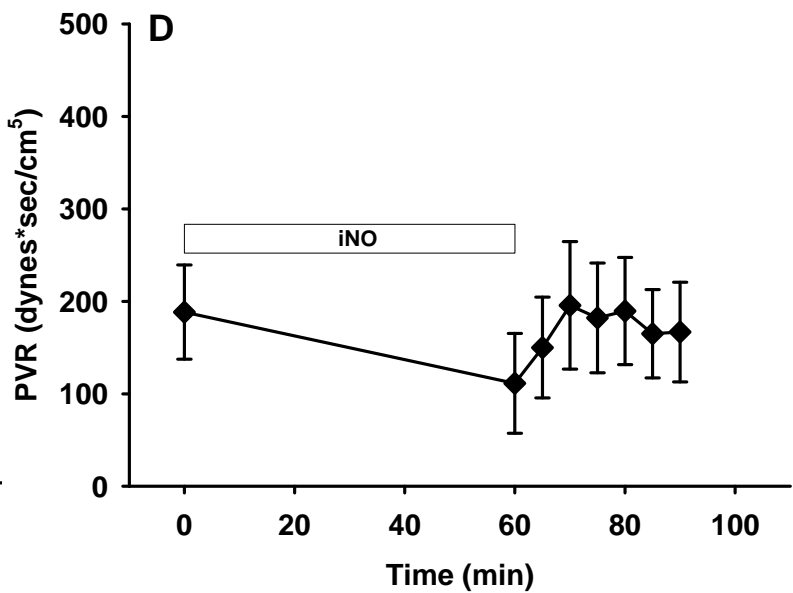

Supplement: NIHMS107687-supplement-1.pdf [file NIHMS107687-supplement-1.pdf]
